# Supplementary material for: Metabolomics Analysis of Sodium Salicylate Improving the Preservation Quality of Ram Sperm
Source: MDPI journal article supplement (doi:10.3390/molecules29010188), 2023-12-28
Supplement: s1 [file s1]

**Table S1.** Differential metabolites between the control group and the sodium salicylate group.

| Name                                                  | RT       | MZ       | VIP      | <i>p</i> -value | FC       |
|-------------------------------------------------------|----------|----------|----------|-----------------|----------|
| Oxalic acid                                           | 431.894  | 88.98709 | 1.375965 | 0.014178        | 0.847817 |
| L-Threonic acid                                       | 323.112  | 135.029  | 1.62059  | 0.002207        | 1.50154  |
| Pentanenitrile                                        | 273.6    | 84.08132 | 1.311646 | 0.036904        | 0.669882 |
| 2-Ketobutyric acid                                    | 400.775  | 101.0234 | 1.425577 | 0.011126        | 1.132806 |
| Glycolic acid                                         | 66.8704  | 75.00778 | 1.351102 | 0.017168        | 0.813339 |
| Glyceraldehyde                                        | 289.1505 | 89.02344 | 1.242214 | 0.02418         | 1.155857 |
| Adenosine                                             | 172.648  | 268.1035 | 1.348196 | 0.016942        | 1.395167 |
| Acetylhydrazine                                       | 505.37   | 75.05595 | 1.484944 | 0.009333        | 0.556198 |
| benzene-1,2,4-triol                                   | 372.147  | 125.0235 | 1.437455 | 0.008445        | 1.20326  |
| Citric acid                                           | 488.522  | 191.0189 | 1.290371 | 0.031218        | 1.509308 |
| 4-(Trimethylammonio)butanoate                         | 395.862  | 146.1175 | 1.634084 | 0.003163        | 1.177757 |
| Terephthalic acid                                     | 377.2445 | 165.0186 | 1.542464 | 0.002478        | 0.868392 |
| Hypoxanthine                                          | 171.511  | 137.0456 | 1.387601 | 0.028497        | 0.917973 |
| Metenamine                                            | 283.654  | 141.1133 | 1.836486 | 0.000352        | 0.681416 |
| 2-Keto-3-deoxy-D-gluconic acid                        | 43.8119  | 177.0398 | 1.287198 | 0.032853        | 0.717181 |
| Gentisaldehyde                                        | 35.6681  | 137.0235 | 2.223218 | 8.52E-08        | 0.005565 |
| ( $\hat{A}$ ±)-Camphoric acid                         | 245.354  | 201.1118 | 1.175752 | 0.036512        | 1.091553 |
| L-Phenylalanine                                       | 276.246  | 164.071  | 1.449835 | 0.00625         | 1.529529 |
| 3-Hydroxycinnamic acid                                | 49.4764  | 163.0393 | 1.096695 | 0.042245        | 1.21376  |
| L-Gulose                                              | 358.2965 | 179.0554 | 1.26942  | 0.023924        | 1.238461 |
| L-Malic acid                                          | 423.4315 | 133.0134 | 1.523123 | 0.005607        | 1.616739 |
| L-Histidine                                           | 415.859  | 156.0768 | 1.476974 | 0.011525        | 1.364208 |
| Pyroglutamic acid                                     | 399.171  | 130.0499 | 1.449978 | 0.013113        | 1.281121 |
| 2-Furoic acid                                         | 488.5485 | 111.0078 | 1.30652  | 0.032348        | 1.520526 |
| Phenylpyruvic acid                                    | 36.80135 | 163.0394 | 1.76049  | 0.000187        | 1.46327  |
| DL-Tyrosine                                           | 320.701  | 182.081  | 1.53939  | 0.004665        | 1.575195 |
| Sorbitol                                              | 304.298  | 181.071  | 1.580987 | 0.005044        | 1.308633 |
| Prostaglandin D1                                      | 94.2597  | 353.2334 | 1.404451 | 0.012997        | 1.27077  |
| Hydroxyprolyl-Hydroxyproline                          | 434.733  | 245.113  | 1.492353 | 0.006772        | 1.433939 |
| Graveoline                                            | 392.405  | 280.0916 | 1.377142 | 0.009047        | 1.346886 |
| Leucinic acid                                         | 111.476  | 131.0704 | 1.403152 | 0.014514        | 1.203754 |
| Sphinganine                                           | 108.8    | 302.3049 | 1.397293 | 0.010263        | 0.705231 |
| 2-Methylbutyroylcarnitine                             | 260.734  | 246.1696 | 1.769086 | 0.000719        | 1.21192  |
| Pyro-L-glutaminy-L-glutamine                          | 348.6    | 258.1081 | 1.225077 | 0.037874        | 1.16117  |
| L-Glutamine                                           | 391.886  | 145.061  | 1.6974   | 0.00113         | 1.284375 |
| Methylmalonic acid                                    | 192.722  | 117.0183 | 1.470976 | 0.00852         | 0.826411 |
| L-Gulonolactone                                       | 66.8704  | 177.0398 | 1.382688 | 0.016748        | 0.846332 |
| Cinnamylideneacetone                                  | 187.8215 | 173.0918 | 1.307632 | 0.010948        | 1.206432 |
| 3-[4-Hydroxy-3-(3-methyl-2-butenyl)phenyl]-2-propenal | 358.5285 | 217.1181 | 1.135966 | 0.032392        | 1.143857 |
| 5-Hydroxytryptophan                                   | 204.16   | 265.0854 | 1.321379 | 0.03491         | 0.82637  |
| 15-KETE                                               | 94.2712  | 317.2123 | 1.442439 | 0.007558        | 1.266711 |

|                                               |          |          |          |          |          |
|-----------------------------------------------|----------|----------|----------|----------|----------|
| Glucosamine                                   | 173.7475 | 192.1228 | 1.323007 | 0.012413 | 1.186342 |
| L-trans-4-Methyl-2-pyrrolidinecarboxylic acid | 544.065  | 130.0863 | 1.573327 | 0.005448 | 1.513784 |
| 2-Furoylglycine                               | 415.9395 | 168.0271 | 1.159341 | 0.006527 | 1.542255 |
| 6-Ketoprostaglandin E1                        | 218.637  | 367.2127 | 1.357169 | 0.016179 | 1.116002 |
| Prolyl-Glutamine                              | 381.744  | 244.129  | 1.255068 | 0.028791 | 1.224466 |
| Dihydrolipoate                                | 66.8376  | 207.0505 | 1.422022 | 0.015441 | 0.790954 |
| Thiabendazole                                 | 478.077  | 202.0472 | 1.710373 | 0.000806 | 2.013532 |
| NAD                                           | 456.405  | 664.116  | 1.414466 | 0.000671 | 2.395318 |
| O-Acetyl-L-serine                             | 416.651  | 148.0603 | 1.262936 | 0.044047 | 1.254757 |
| (E)-2-Tridecene-4,6,8-triyn-1-ol              | 351.534  | 187.1075 | 1.382798 | 0.013647 | 1.340684 |
| Hippuric acid                                 | 203.31   | 178.0503 | 1.253633 | 0.01818  | 1.155507 |
| D-Xylulose                                    | 270.638  | 149.0447 | 1.418421 | 0.009965 | 1.210459 |
| N-a-Acetyl-L-arginine                         | 389.945  | 217.1292 | 1.315132 | 0.016425 | 1.242728 |
| 14,19-Didehydrocondyfolan                     | 353.938  | 267.1911 | 1.373135 | 0.013169 | 1.347249 |
| PC(18:3(6Z,9Z,12Z)/P-18:1(11Z))               | 130.202  | 766.5744 | 1.518575 | 0.005996 | 1.49453  |
| alpha-Tocopherol acetate                      | 84.6034  | 473.3985 | 1.360848 | 0.024393 | 0.714723 |
| Cytarabine                                    | 407.484  | 244.0945 | 1.18628  | 0.04171  | 0.879318 |
| Dehydroascorbic acid                          | 109.166  | 173.0084 | 1.627032 | 0.005286 | 1.727105 |
| Benzoylformic acid                            | 134.473  | 149.027  | 1.11104  | 0.044793 | 0.854177 |
| PC(22:1(13Z)/14:0)                            | 160.8305 | 788.6149 | 1.202722 | 0.036546 | 0.641904 |
| PC(16:1(9Z)/P-18:1(11Z))                      | 142.854  | 742.5733 | 1.327208 | 0.027121 | 1.350365 |
| Mukurozidiol                                  | 111.667  | 335.1055 | 1.511255 | 0.004464 | 1.329536 |
| Taurocholic acid                              | 205.84   | 514.2847 | 1.125268 | 0.027323 | 1.224036 |
| PC(16:1(9Z)/14:0)                             | 158.7835 | 704.5215 | 1.479914 | 0.008002 | 1.262633 |
| 3-Hydroxymethylglutaric acid                  | 268.75   | 163.0598 | 1.185075 | 0.03011  | 1.45394  |
| Dimethyl dialkyl ammonium chloride            | 113.186  | 304.2994 | 1.884476 | 0.003051 | 0.36095  |
| SM(d17:1/24:1(15Z))                           | 196.079  | 799.6677 | 1.371156 | 0.004481 | 0.603633 |
| PC(14:0/14:0)                                 | 162.3435 | 678.5064 | 1.314746 | 0.037879 | 1.285886 |
| PC(18:1(9Z)/18:0)                             | 281.426  | 788.6159 | 1.14331  | 0.041971 | 0.76212  |
| PC(18:4(6Z,9Z,12Z,15Z)/18:2(9Z,12Z))          | 144.046  | 778.5372 | 1.426958 | 0.007028 | 1.490229 |
| PC(20:5(5Z,8Z,11Z,14Z,17Z)/P-18:1(11Z))       | 63.96045 | 790.5732 | 1.343484 | 0.036494 | 1.415844 |
| SM(d18:1/12:0)                                | 206.713  | 647.5121 | 1.278955 | 0.035353 | 1.302706 |
| 2-Methyl-4-oxopentanedioic acid               | 68.51625 | 161.0444 | 1.156154 | 0.029609 | 0.746379 |
| PC(18:1(11Z)/15:0)                            | 92.4771  | 746.5707 | 1.739019 | 0.005301 | 0.536267 |
| PC(P-18:1(11Z)/20:5(5Z,8Z,11Z,14Z,17Z))       | 51.2496  | 790.5735 | 1.286485 | 0.037155 | 1.369532 |
| PC(P-18:1(11Z)/22:6(4Z,7Z,10Z,13Z,16Z,19Z))   | 121.012  | 816.5898 | 1.353268 | 0.027864 | 1.27622  |
| PC(22:1(13Z)/15:0)                            | 143.688  | 802.6323 | 1.563461 | 0.001468 | 0.580843 |
| DL-Tryptophan                                 | 279.921  | 203.082  | 1.615507 | 0.001678 | 1.701489 |
| SM(d18:1/24:1(15Z))                           | 195.629  | 813.6841 | 1.747175 | 0.000565 | 0.531798 |
| SM(d18:1/20:0)                                | 198.064  | 759.637  | 1.964901 | 1.63E-05 | 0.78075  |

|                                                       |          |          |          |          |          |
|-------------------------------------------------------|----------|----------|----------|----------|----------|
| stearoyl sphingomyelin                                | 200.409  | 731.6058 | 1.844195 | 7.81E-05 | 0.65732  |
| O-Phosphotyrosine                                     | 506.683  | 262.0503 | 1.369717 | 0.019628 | 1.530632 |
| 3-Methylhistidine                                     | 398.463  | 170.0922 | 1.401868 | 0.01627  | 1.278291 |
| Proline betaine                                       | 376.97   | 144.1019 | 1.684119 | 0.002407 | 1.197387 |
| 5,7alpha-Dihydro-1,4,4,7a-tetramethyl-4H-indene       | 32.7231  | 175.148  | 1.682699 | 0.003753 | 0.589416 |
| Glutaric acid                                         | 171.218  | 131.0341 | 1.615612 | 0.005351 | 0.83757  |
| Tryptophol [xylosyl-(1->6)-glucoside]                 | 224.361  | 456.1797 | 1.394924 | 0.015948 | 1.115142 |
| Pelargonic acid                                       | 42.6326  | 157.1226 | 1.331023 | 0.023555 | 0.801432 |
| 2,3,5-Trimethyl-6-[4-(methylthio)butyl]pyrazine       | 392.234  | 225.1441 | 1.64827  | 0.019384 | 3.092337 |
| 1-Deoxynojirimycin                                    | 185.1205 | 164.0916 | 1.385807 | 0.007089 | 1.229546 |
| Leukotriene B4                                        | 94.2777  | 335.2228 | 1.409048 | 0.0145   | 1.266647 |
| PC(18:2(9Z,12Z)/15:0)                                 | 92.47325 | 744.5538 | 1.381948 | 0.028426 | 0.581074 |
| Eicosadienoic acid                                    | 400.542  | 292.9981 | 1.396775 | 0.010815 | 0.823322 |
| 11,12-Dimethoxydihydrokawain                          | 207.7595 | 293.1338 | 1.512027 | 0.005517 | 0.668055 |
| Prostaglandin F1a                                     | 186.114  | 355.249  | 1.329647 | 0.01928  | 1.129651 |
| L-Galactose                                           | 270.18   | 198.0969 | 1.41196  | 0.016059 | 1.359687 |
| 7-Methylxanthine                                      | 338.143  | 165.0397 | 1.31565  | 0.020648 | 1.235843 |
| Rutacultin                                            | 164.7465 | 275.1233 | 1.272747 | 0.046331 | 0.613272 |
| Phenylalanyl-Arginine                                 | 333.296  | 322.1871 | 1.20078  | 0.028843 | 1.339251 |
| Calystegine B5                                        | 317.277  | 176.0916 | 1.339174 | 0.024022 | 0.663182 |
| Citramalic acid                                       | 410.483  | 147.029  | 1.346558 | 0.016418 | 0.842059 |
| L-Aspartic acid                                       | 423.432  | 132.0294 | 1.407851 | 0.010238 | 1.351397 |
| 4-(2,6,6-Trimethyl-1,3-cyclohexadien-1-yl)-2-butanone | 32.73725 | 193.1586 | 1.543365 | 0.003957 | 0.583827 |
| Argininic acid                                        | 382.675  | 176.1029 | 1.273096 | 0.010782 | 1.288826 |
| 4-Aminohippuric acid                                  | 205.809  | 193.0613 | 1.246869 | 0.021341 | 1.21141  |
| L-beta-aspartyl-L-threonine                           | 451.5375 | 235.0921 | 1.315966 | 0.043455 | 0.827499 |
| LysoPC(16:0)                                          | 217.063  | 496.3395 | 1.166903 | 0.030179 | 1.155208 |
| 2-Phenylglycine                                       | 250.1565 | 152.0703 | 1.264468 | 0.022068 | 0.75539  |
| 12-Oxo-2,3-dinor-10,15-phytodienoic acid              | 314.8175 | 265.1754 | 1.882098 | 0.00027  | 1.300812 |
| Glycyl-glycine                                        | 400.565  | 133.0607 | 1.506078 | 0.00818  | 1.212506 |
| 1-Isothiocyanato-7-(methylthio)heptane                | 166.9145 | 204.0866 | 1.776403 | 0.001143 | 0.767001 |
| 2-Oxo-4-methylthiobutanoic acid                       | 57.6908  | 147.0113 | 1.398369 | 0.023504 | 1.379668 |
| Isoferulic acid 3-sulfate                             | 488.5435 | 275.0243 | 1.289441 | 0.038723 | 2.497786 |
| 4-Amino-2-methylenebutanoic acid                      | 111.76   | 116.0707 | 1.411157 | 0.030057 | 0.713497 |
| 3-Methylglutaryl carnitine                            | 415.64   | 290.1596 | 1.326155 | 0.046555 | 1.212918 |
| 6-Hydroxyshogaol                                      | 381.477  | 293.1703 | 1.541196 | 0.007207 | 1.244805 |
| Cellulose triacetate                                  | 476.2    | 537.2225 | 2.022396 | 2.14E-05 | 2.335078 |
| Mesylate                                              | 108.025  | 94.97987 | 1.262923 | 0.030395 | 0.825107 |
| N,N-Dimethylguanosine                                 | 199.9985 | 310.1147 | 1.566441 | 0.004028 | 1.421784 |
| N6-Acetyl-5S-hydroxy-L-lysine                         | 199.396  | 205.1181 | 1.118146 | 0.042531 | 1.372259 |

|                                                                                |          |          |          |          |          |
|--------------------------------------------------------------------------------|----------|----------|----------|----------|----------|
| Achillicin                                                                     | 360.487  | 307.1473 | 1.203279 | 0.037986 | 1.267438 |
| O-Acetylserine                                                                 | 76.0376  | 146.045  | 1.313688 | 0.031019 | 0.824637 |
| 4-(Methylthio)-1-butanol                                                       | 117.656  | 121.0689 | 1.0519   | 0.039552 | 0.661301 |
| Grevilline C                                                                   | 457.385  | 357.0554 | 1.229159 | 0.046031 | 1.406458 |
| PE(20:2(11Z,14Z)/14:0)                                                         | 156.6    | 716.5212 | 1.301143 | 0.026592 | 0.844436 |
| 3,4-Dihydroxy-2-hydroxymethyl-1-pyrrolidinepropanamide                         | 187.819  | 205.1181 | 1.548526 | 0.01081  | 0.568822 |
| Linamarin                                                                      | 262.795  | 265.1389 | 1.361727 | 0.024345 | 1.206979 |
| Anaxagoreine                                                                   | 195.785  | 284.1336 | 1.715487 | 0.000494 | 1.401815 |
| 1-Deoxy-D-xylulose 5-phosphate                                                 | 65.8809  | 213.0167 | 1.526479 | 0.015829 | 0.668049 |
| Valyl-Glutamine                                                                | 362.75   | 246.1445 | 1.39311  | 0.018079 | 1.33339  |
| (6R,7S)-6,7-Epoxy-1,3-tetradecadiyne                                           | 343.635  | 205.1546 | 1.399454 | 0.006323 | 0.761678 |
| Valyl-Lysine                                                                   | 557.574  | 246.181  | 1.250324 | 0.022751 | 1.162855 |
| Nandrolone                                                                     | 88.508   | 275.1964 | 1.421584 | 0.008038 | 0.598151 |
| N-Acetyl-a-neuraminic acid                                                     | 201.363  | 310.1127 | 1.347094 | 0.032305 | 1.642667 |
| 6,7-Dihydro-4-(hydroxymethyl)-2-(p-hydroxyphenethyl)-7-methyl-5H-2-pyrindinium | 361.174  | 285.1655 | 1.351655 | 0.024334 | 1.47021  |
| Camelinin                                                                      | 420.127  | 262.1279 | 1.951566 | 0.000156 | 1.545112 |
| PE(22:2(13Z,16Z)/14:0)                                                         | 174.3255 | 744.5536 | 1.294233 | 0.024496 | 0.532996 |

RT, the chromatographic retention time of the substance; MZ, the mass to charge ratio of characteristic ions in a substance; VIP, variable importance in projection; *p*-value, obtained from the t-test of the substance in this group comparison; FC, fold change.

**Table S2.** Enrichment analysis of differential metabolites in sheep sperm from sodium salicylate group and control group.

| Name                                        | Number | p-value  | Name                                                   | Number | p-value  |
|---------------------------------------------|--------|----------|--------------------------------------------------------|--------|----------|
| Metabolic pathways                          | 37     | 0.001018 | Taurine and hypotaurine metabolism                     | 1      | 0.197025 |
| Biosynthesis of amino acids                 | 7      | 0.000163 | Glutathione metabolism                                 | 1      | 0.304535 |
| Biosynthesis of cofactors                   | 7      | 0.032225 | Amino sugar and nucleotide sugar metabolism            | 1      | 0.67968  |
| ABC transporters                            | 6      | 0.001687 | Glycosylphosphatidylinositol (GPI)-anchor biosynthesis | 1      | 0.037362 |
| Cysteine and methionine metabolism          | 5      | 0.000347 | Linoleic acid metabolism                               | 1      | 0.234549 |
| D-Amino acid metabolism                     | 5      | 0.000372 | alpha-Linolenic acid metabolism                        | 1      | 0.343488 |
| 2-Oxocarboxylic acid metabolism             | 5      | 0.008072 | Vitamin B6 metabolism                                  | 1      | 0.241846 |
| Central carbon metabolism in cancer         | 5      | 2.07E-05 | Pantothenate and CoA biosynthesis                      | 1      | 0.249075 |
| Purine metabolism                           | 4      | 0.013635 | Lipoic acid metabolism                                 | 1      | 0.116516 |
| Arachidonic acid metabolism                 | 4      | 0.005183 | Terpenoid backbone biosynthesis                        | 1      | 0.355993 |
| Glyoxylate and dicarboxylate metabolism     | 4      | 0.002599 | Nitrogen metabolism                                    | 1      | 0.165719 |
| Aminoacyl-tRNA biosynthesis                 | 4      | 0.001451 | Sulfur metabolism                                      | 1      | 0.270361 |
| Carbon metabolism                           | 4      | 0.021833 | Drug metabolism - other enzymes                        | 1      | 0.392129 |
| Protein digestion and absorption            | 4      | 0.000921 | Biosynthesis of unsaturated fatty acids                | 1      | 0.508468 |
| Ascorbate and aldarate metabolism           | 3      | 0.016197 | Biosynthesis of nucleotide sugars                      | 1      | 0.857525 |
| Alanine, aspartate and glutamate metabolism | 3      | 0.002192 | PPAR signaling pathway                                 | 1      | 0.046488 |
| Histidine metabolism                        | 3      | 0.009581 | cGMP-PKG signaling pathway                             | 1      | 0.090864 |
| Glycerophospholipid metabolism              | 3      | 0.015445 | cAMP signaling pathway                                 | 1      | 0.212245 |
| Sphingolipid signaling pathway              | 3      | 0.000332 | Sulfur relay system                                    | 1      | 0.099495 |
| Neuroactive ligand-receptor interaction     | 3      | 0.012639 | Autophagy - other                                      | 1      | 0.028151 |
| Galactose metabolism                        | 2      | 0.069733 | Autophagy - animal                                     | 1      | 0.055529 |
| Arginine biosynthesis                       | 2      | 0.019528 | AMPK signaling pathway                                 | 1      | 0.189308 |
| Pyrimidine metabolism                       | 2      | 0.122297 | Longevity regulating pathway                           | 1      | 0.073361 |
| Glycine, serine and threonine metabolism    | 2      | 0.075113 | Necroptosis                                            | 1      | 0.090864 |

|                                                     |   |          |                                                   |   |          |
|-----------------------------------------------------|---|----------|---------------------------------------------------|---|----------|
| beta-Alanine metabolism                             | 2 | 0.036292 | Vascular smooth muscle contraction                | 1 | 0.141462 |
| Sphingolipid metabolism                             | 2 | 0.022881 | Glutamatergic synapse                             | 1 | 0.073361 |
| Propanoate metabolism                               | 2 | 0.054439 | Serotonergic synapse                              | 1 | 0.330746 |
| Thiamine metabolism                                 | 2 | 0.034226 | GABAergic synapse                                 | 1 | 0.082153 |
| Nicotinate and nicotinamide metabolism              | 2 | 0.094922 | Taste transduction                                | 1 | 0.263332 |
| Retrograde endocannabinoid signaling                | 2 | 0.013517 | Inflammatory mediator regulation of TRP channels  | 1 | 0.284223 |
| Bile secretion                                      | 2 | 0.233819 | Glucagon signaling pathway                        | 1 | 0.21975  |
| Mineral absorption                                  | 2 | 0.030239 | Regulation of lipolysis in adipocytes             | 1 | 0.124909 |
| Choline metabolism in cancer                        | 2 | 0.004561 | Renin secretion                                   | 1 | 0.149623 |
| Citrate cycle (TCA cycle)                           | 1 | 0.173656 | Aldosterone synthesis and secretion               | 1 | 0.189308 |
| Pentose and glucuronate interconversions            | 1 | 0.426284 | Alcoholic liver disease                           | 1 | 0.099495 |
| Fructose and mannose metabolism                     | 1 | 0.403728 | Proximal tubule bicarbonate reclamation           | 1 | 0.149623 |
| Fatty acid degradation                              | 1 | 0.380309 | Vitamin digestion and absorption                  | 1 | 0.311181 |
| Primary bile acid biosynthesis                      | 1 | 0.362157 | Cholesterol metabolism                            | 1 | 0.090864 |
| Oxidative phosphorylation                           | 1 | 0.141462 | Parkinson disease                                 | 1 | 0.21975  |
| Caffeine metabolism                                 | 1 | 0.189308 | Morphine addiction                                | 1 | 0.073361 |
| Valine, leucine and isoleucine degradation          | 1 | 0.330746 | Alcoholism                                        | 1 | 0.090864 |
| Valine, leucine and isoleucine biosynthesis         | 1 | 0.197025 | Kaposi sarcoma-associated herpesvirus infection   | 1 | 0.046488 |
| Lysine degradation                                  | 1 | 0.380309 | Chemical carcinogenesis - reactive oxygen species | 1 | 0.420724 |
| Phenylalanine metabolism                            | 1 | 0.374315 | Diabetic cardiomyopathy                           | 1 | 0.311181 |
| Phenylalanine, tyrosine and tryptophan biosynthesis | 1 | 0.277324 |                                                   |   |          |

*p*-value, obtained from the t-test of the substance in this group comparison; Number, the number of differential metabolites in this pathway.

**Table S3.** Analysis of metabolomic pathways in the control group and sodium salicylate group.

| Pathway                                             | Total | Hits | Raw p    | Impact  | Hits ID                                                    |
|-----------------------------------------------------|-------|------|----------|---------|------------------------------------------------------------|
| Nitrogen metabolism                                 | 9     | 2    | 0.033226 | 0       | L-Glutamine, L-Histidine                                   |
| Histidine metabolism                                | 14    | 2    | 0.075649 | 0.26619 | L-Histidine, L-Aspartic acid                               |
| Glyoxylate and dicarboxylate metabolism             | 16    | 2    | 0.095705 | 0.33334 | Glycolic acid, Citric acid                                 |
| Phenylalanine, tyrosine and tryptophan biosynthesis | 4     | 1    | 0.12599  | 0.5     | L-Phenylalanine                                            |
| D-Glutamine and D-glutamate metabolism              | 5     | 1    | 0.15498  | 0       | L-Glutamine                                                |
| Aminoacyl-tRNA biosynthesis                         | 64    | 4    | 0.15741  | 0       | L-Histidine, L-Phenylalanine, L-Glutamine, L-Aspartic acid |
| Alanine, aspartate and glutamate metabolism         | 23    | 2    | 0.17481  | 0.27667 | L-Aspartic acid, L-Glutamine                               |
| Taurine and hypotaurine metabolism                  | 7     | 1    | 0.21016  | 0       | Taurocholic acid                                           |
| Ascorbate and aldarate metabolism                   | 9     | 1    | 0.26181  | 0       | L-Gulonolactone                                            |
| Phenylalanine metabolism                            | 9     | 1    | 0.26181  | 0.40741 | L-Phenylalanine                                            |
| Caffeine metabolism                                 | 12    | 1    | 0.33314  | 0       | 7-Methylxanthine                                           |
| Nicotinate and nicotinamide metabolism              | 13    | 1    | 0.35539  | 0.2439  | NAD                                                        |
| Purine metabolism                                   | 68    | 3    | 0.39287  | 0.0118  | L-Glutamine, Adenosine, Hypoxanthine                       |
| Arginine and proline metabolism                     | 44    | 2    | 0.43196  | 0       | L-Glutamine, L-Aspartic acid                               |
| beta-Alanine metabolism                             | 17    | 1    | 0.43733  | 0       | L-Aspartic acid                                            |
| Fructose and mannose metabolism                     | 19    | 1    | 0.47439  | 0.06818 | Sorbitol                                                   |
| Citrate cycle (TCA cycle)                           | 20    | 1    | 0.49201  | 0.05356 | Citric acid                                                |
| Sphingolipid metabolism                             | 21    | 1    | 0.50905  | 0.14286 | Sphinganine                                                |
| Galactose metabolism                                | 26    | 1    | 0.58623  | 0       | Sorbitol                                                   |
| Glutathione metabolism                              | 26    | 1    | 0.58623  | 0.01431 | Pyroglutamic acid                                          |
| Cysteine and methionine metabolism                  | 28    | 1    | 0.61366  | 0.07992 | 2-Oxo-4-methylthiobutanoic acid                            |
| Amino sugar and nucleotide sugar metabolism         | 37    | 1    | 0.71661  | 0       | Glucosamine                                                |
| Valine, leucine and isoleucine degradation          | 38    | 1    | 0.72624  | 0       | Methylmalonic acid                                         |
| Biosynthesis of unsaturated fatty acids             | 42    | 1    | 0.76165  | 0       | Icosadienoic acid                                          |

|                                |    |   |         |         |                  |
|--------------------------------|----|---|---------|---------|------------------|
| Primary bile acid biosynthesis | 46 | 1 | 0.79257 | 0.02976 | Taurocholic acid |
|--------------------------------|----|---|---------|---------|------------------|

Total, the total number of compounds in the pathway; Hits, the actually matched number from the user uploaded data; Raw p, the original *p*-value calculated from the enrichment analysis; Impact, the pathway impact value calculated from pathway topology analysis; Hits ID, names of differential metabolites.



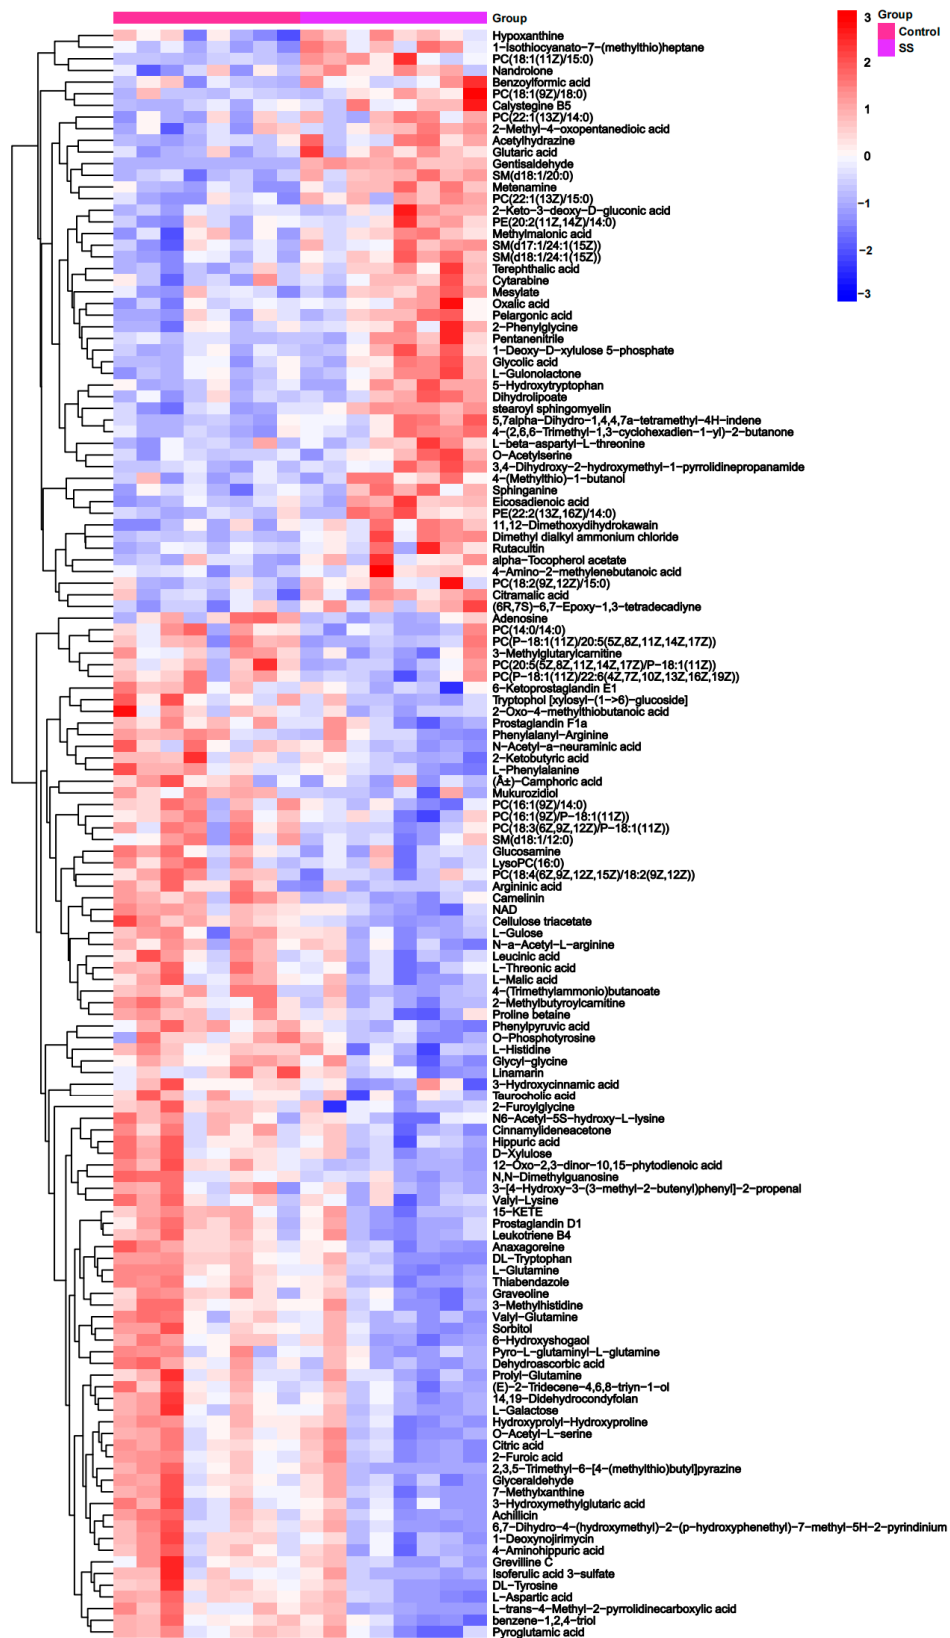

**Figure S1.** Hierarchical cluster analysis thermogram of differential metabolites in sodium salicylate (SS) sheep sperm of the control group.
